# Supplementary material
Source: bioRxiv or medRxiv preprint supplement (https://www.biorxiv.org/highwire/filestream/59462/field_highwire_adjunct_files/0/195495-1.pdf)
Supplement: Supplementary file [file 195495-1.pdf]

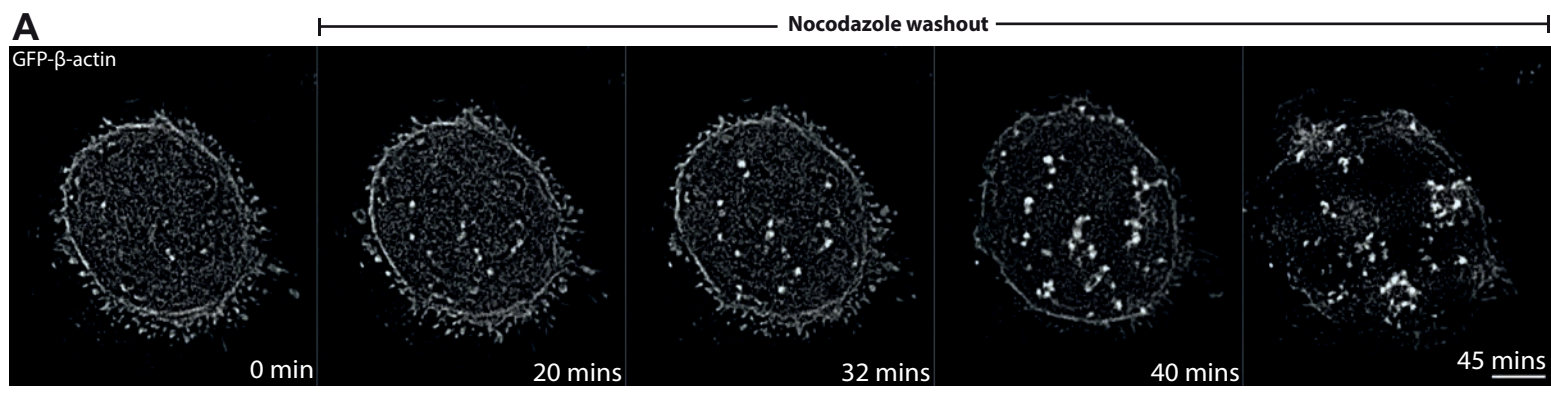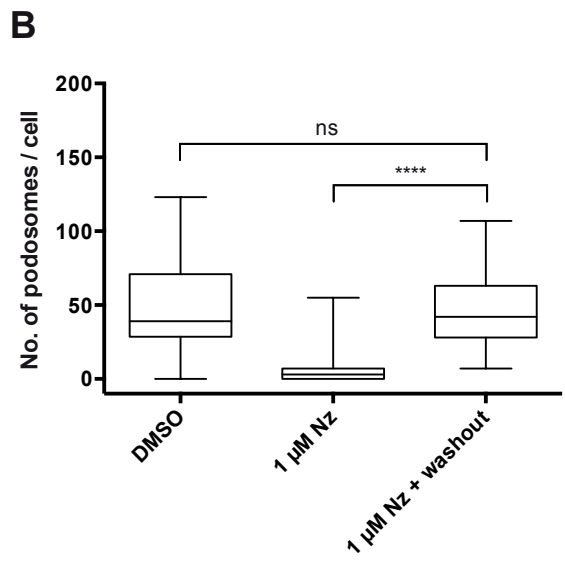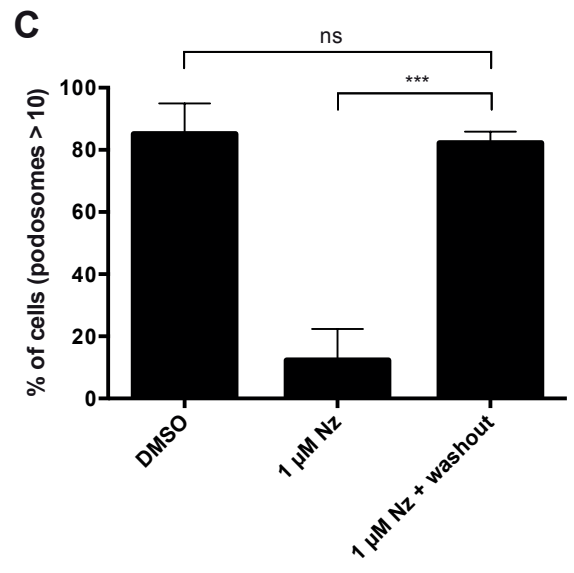

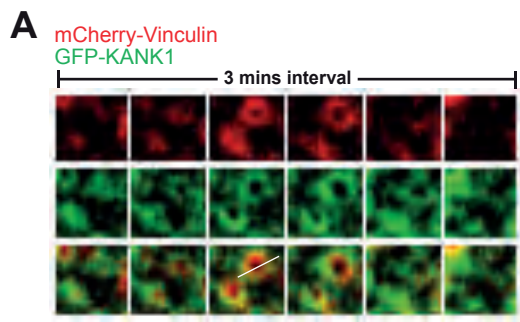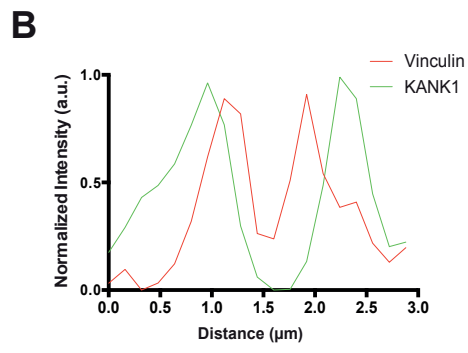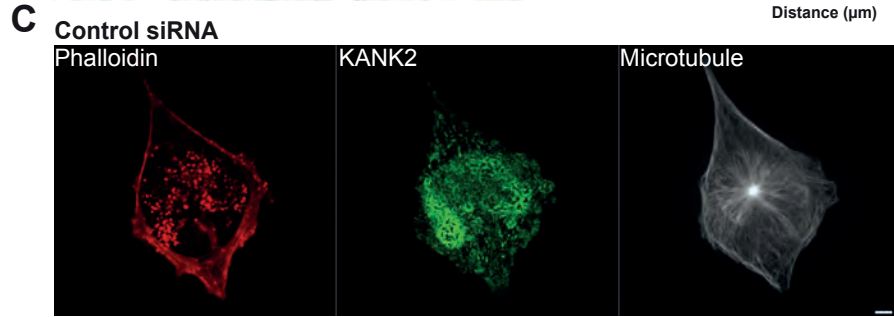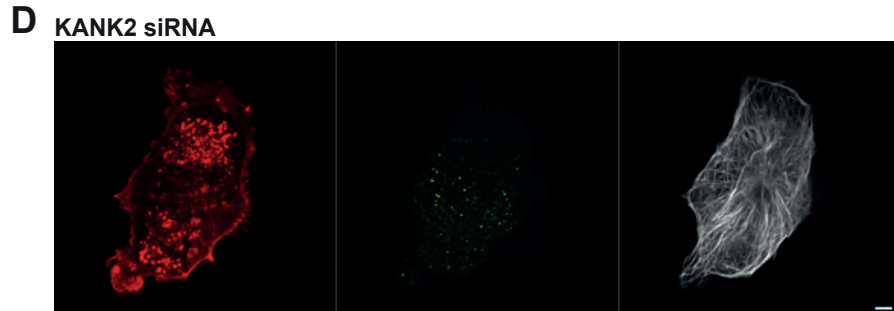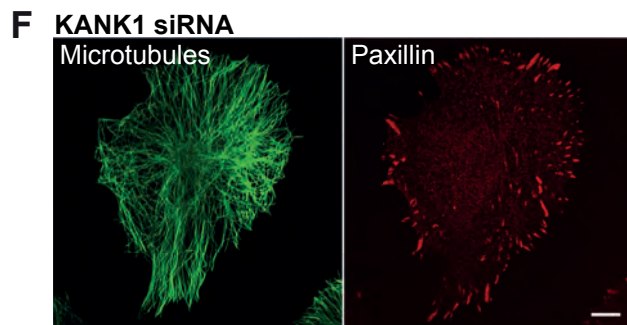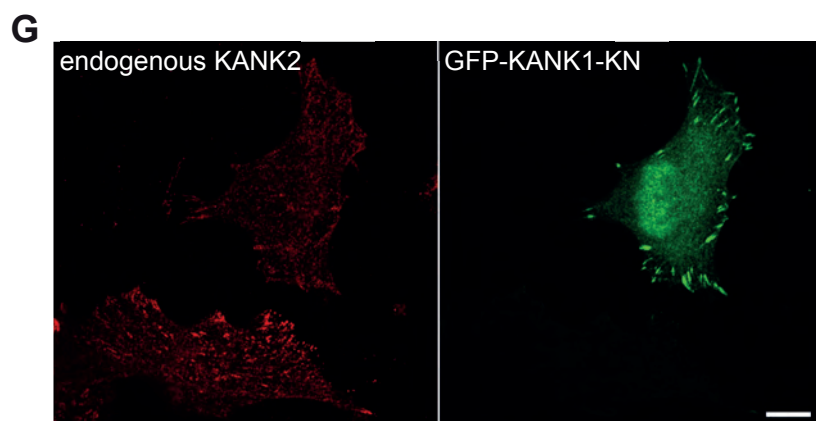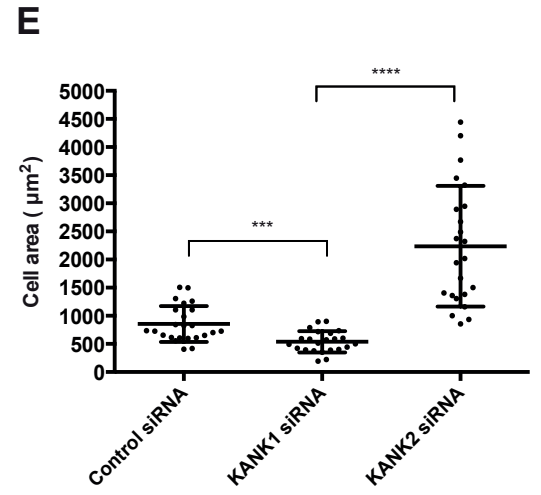

**A**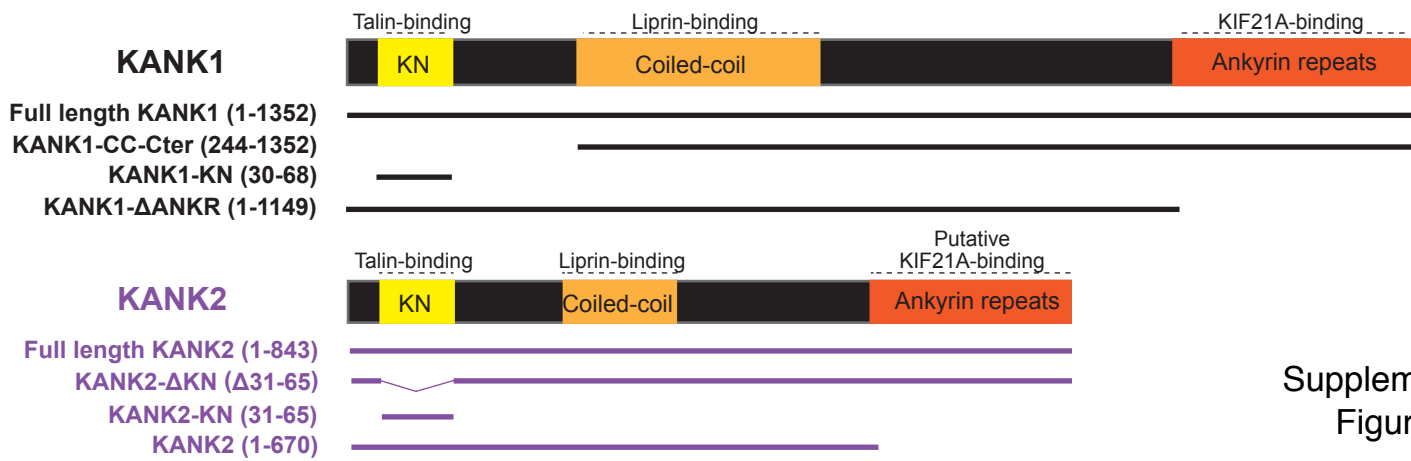Supplementary  
Figure 3**B** KANK1 siRNA + GFP-KANK1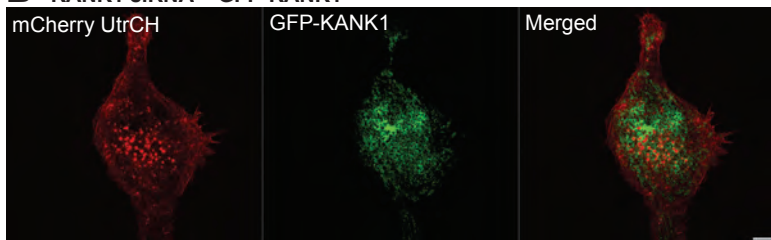**C** KANK1 siRNA + GFP-KANK1 $\Delta$ ANKR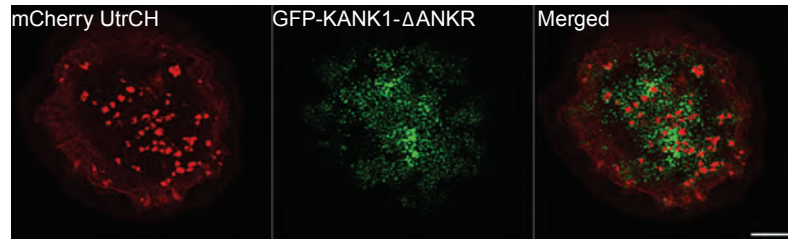**D** KANK1 siRNA + GFP-KANK1-KN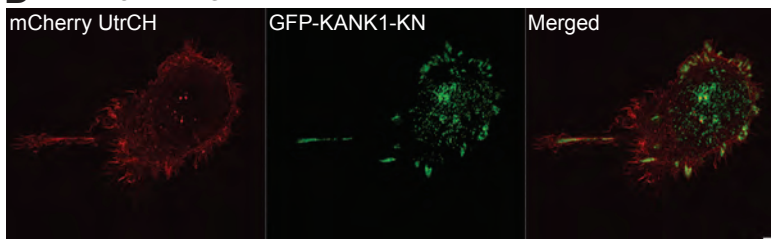**E** KANK1 siRNA + GFP-KANK1-CC-Cter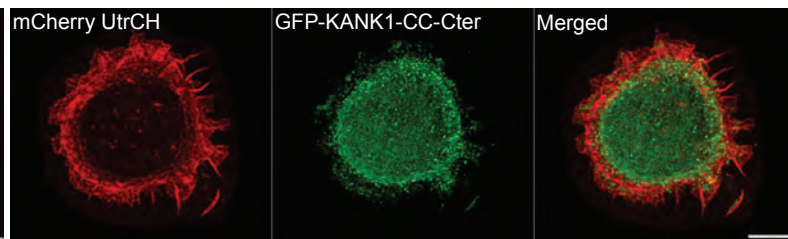**F** Control siRNA + GFP-KANK1 $\Delta$ ANKR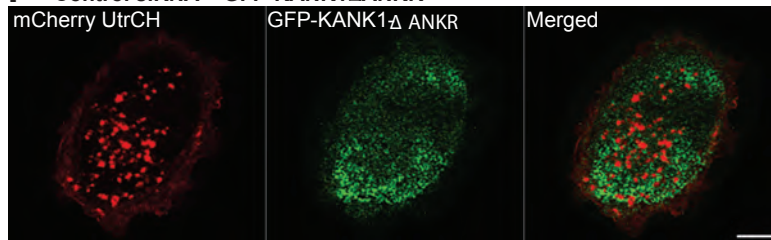**G** Control siRNA + GFP-KANK1-CC-Cter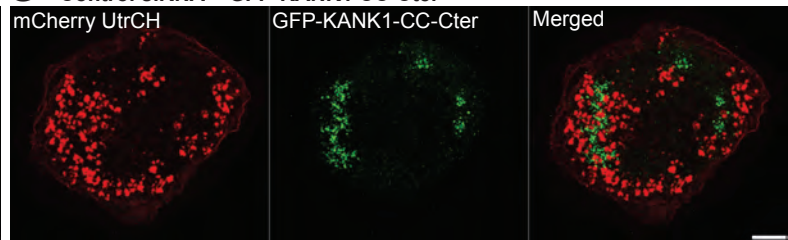**H** KANK2 siRNA + GFP-KANK2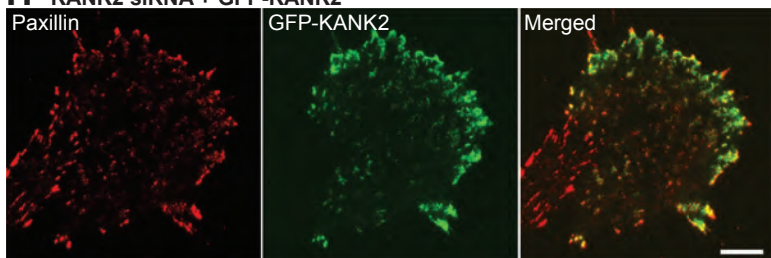**I** KANK2 siRNA + GFP-KANK2-(1-670)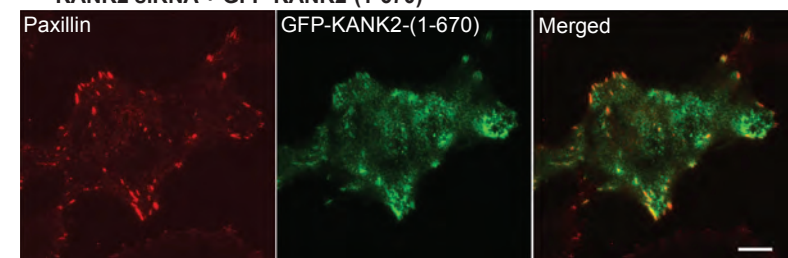**J** KANK2 siRNA + GFP-KANK2-KN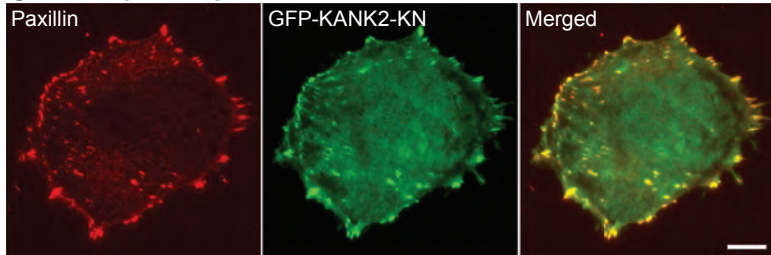**K** KANK2 siRNA + GFP-KANK2- $\Delta$ KN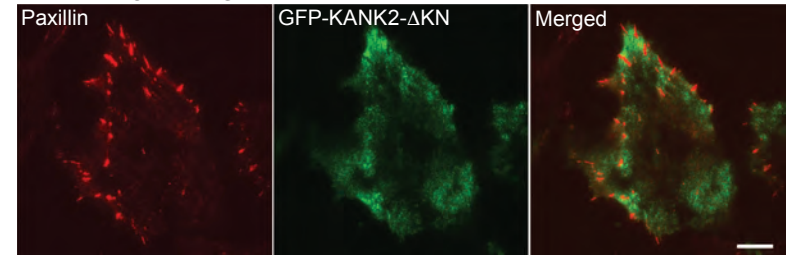**L** Control siRNA + GFP-KANK2-(1-670)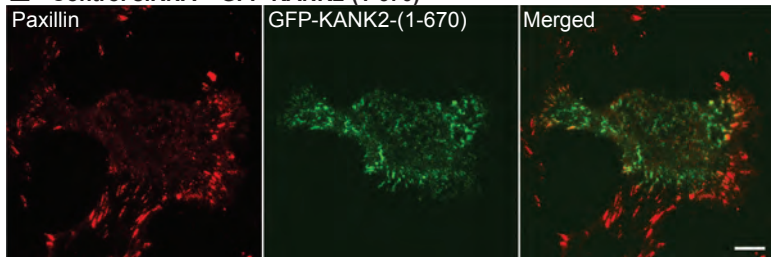**M** Control siRNA + GFP-KANK2- $\Delta$ KN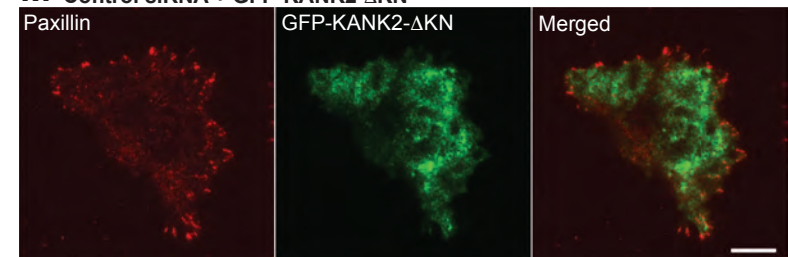



**A**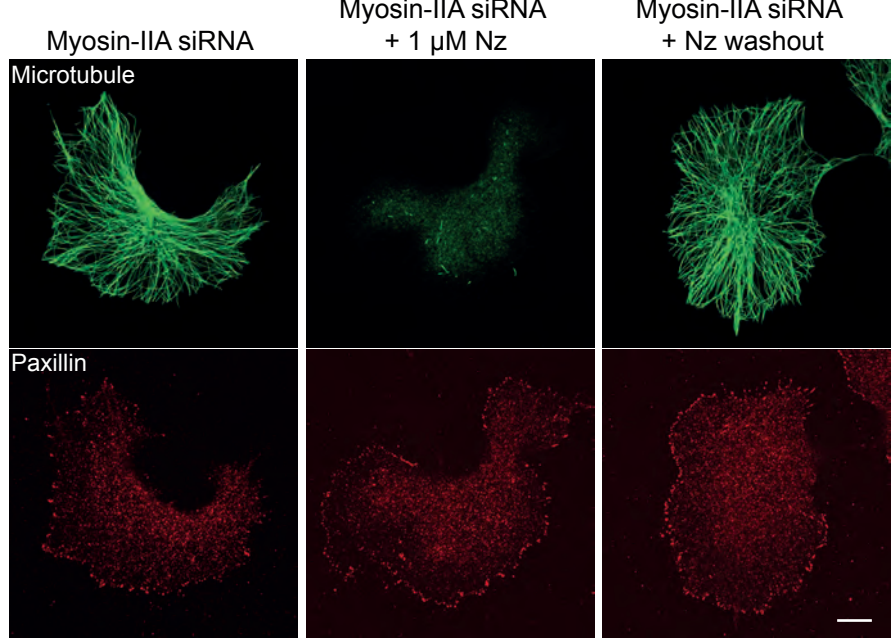**B**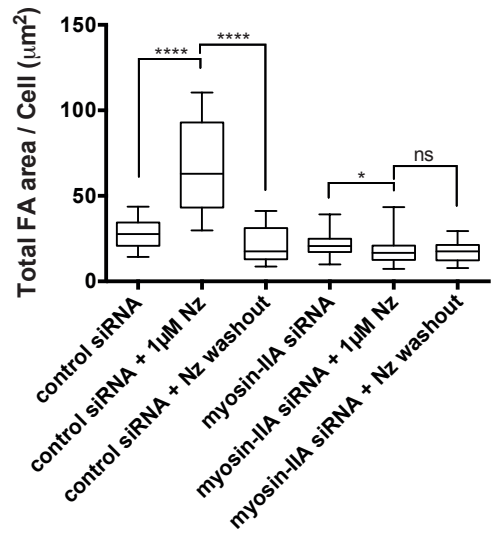**C**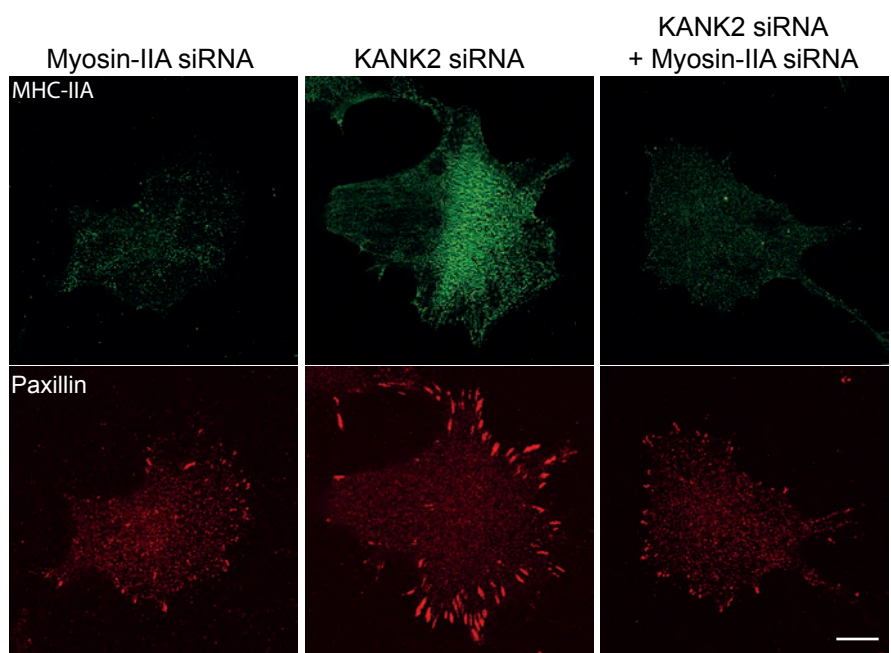

**A**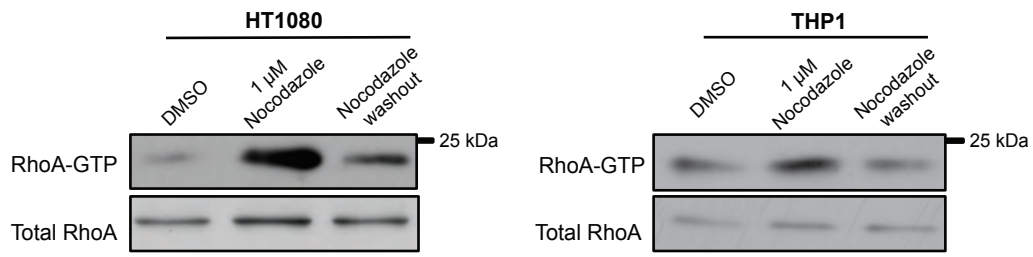**B**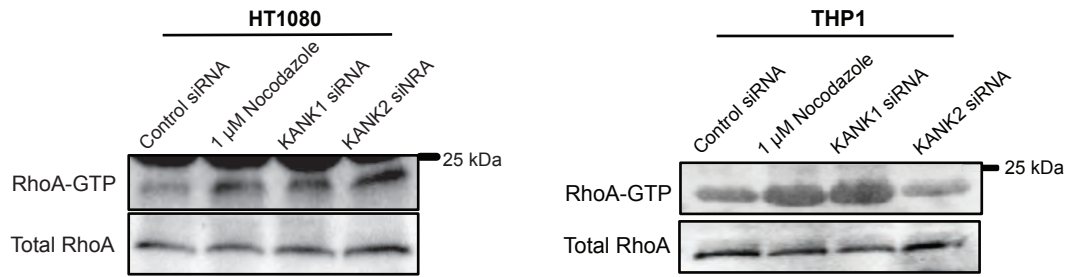

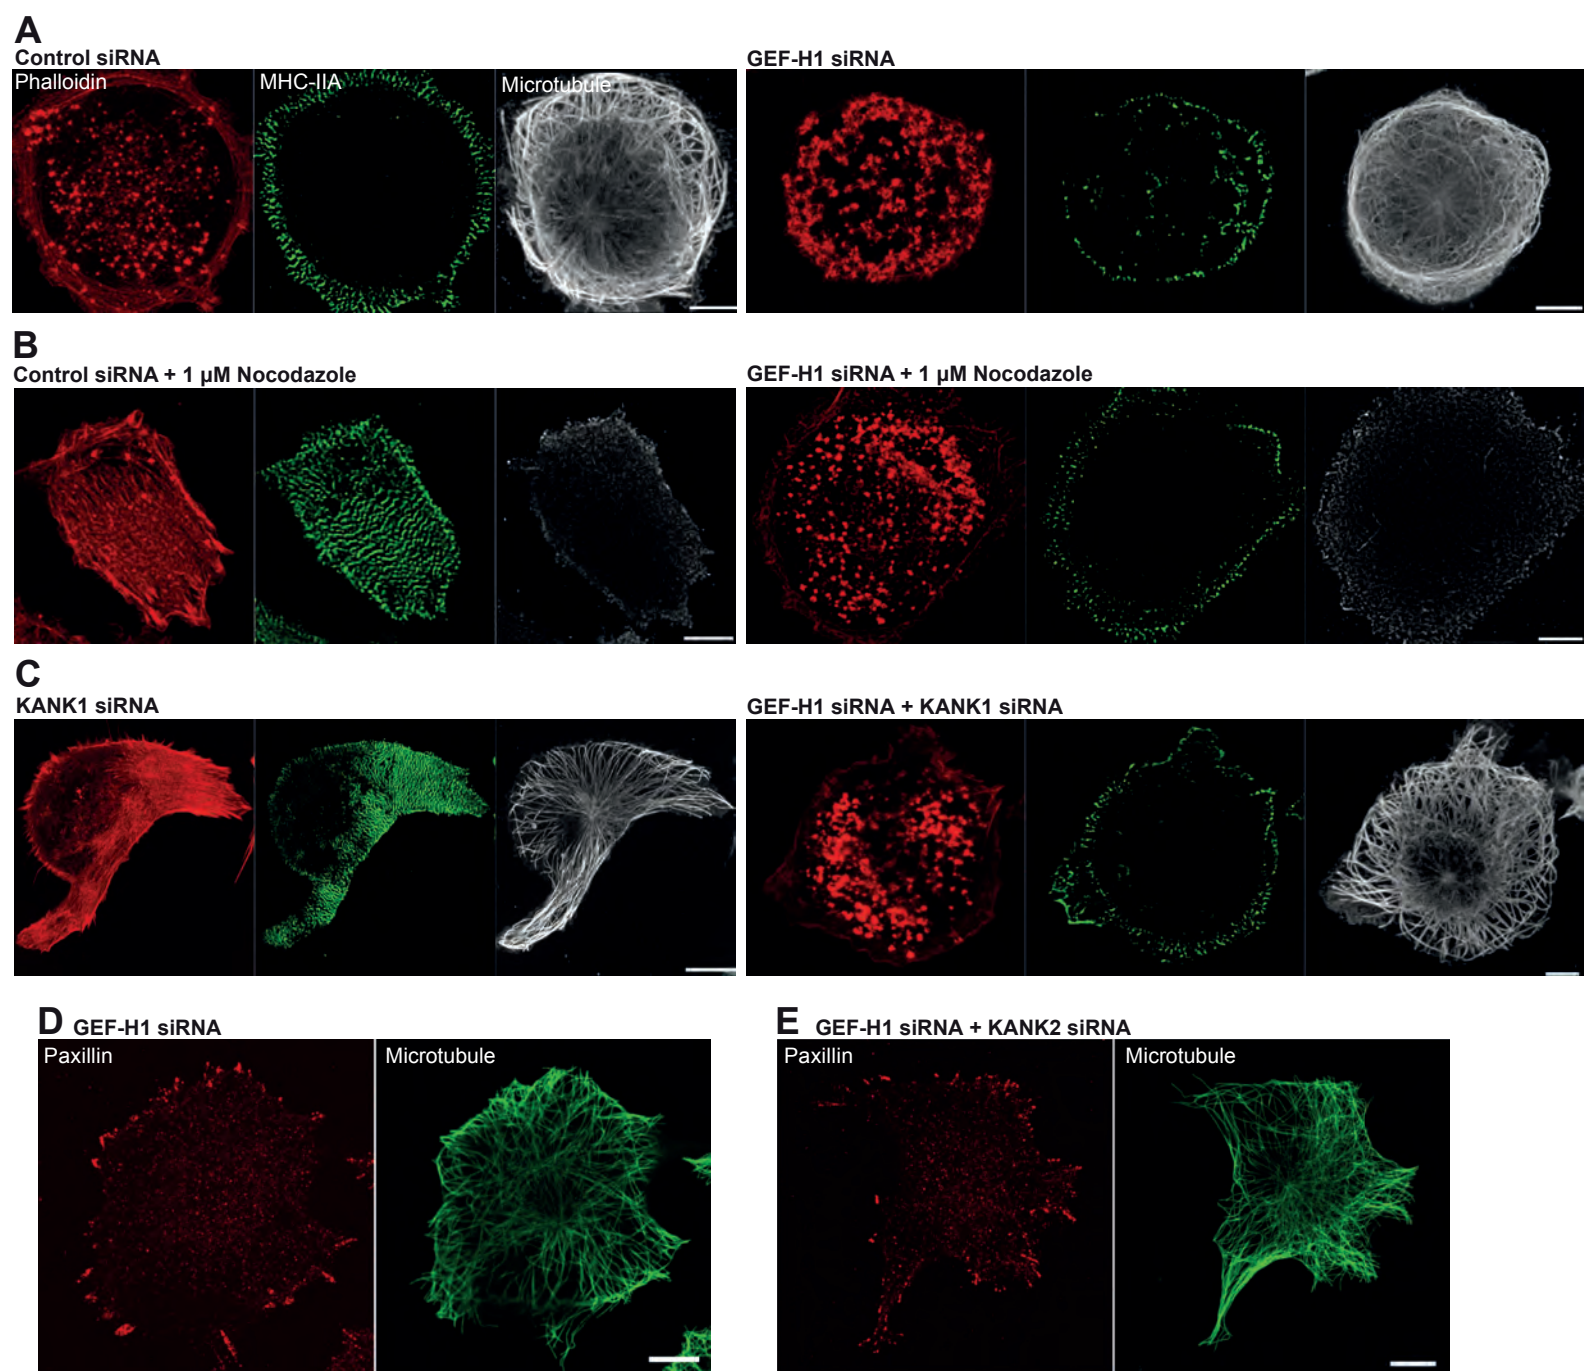



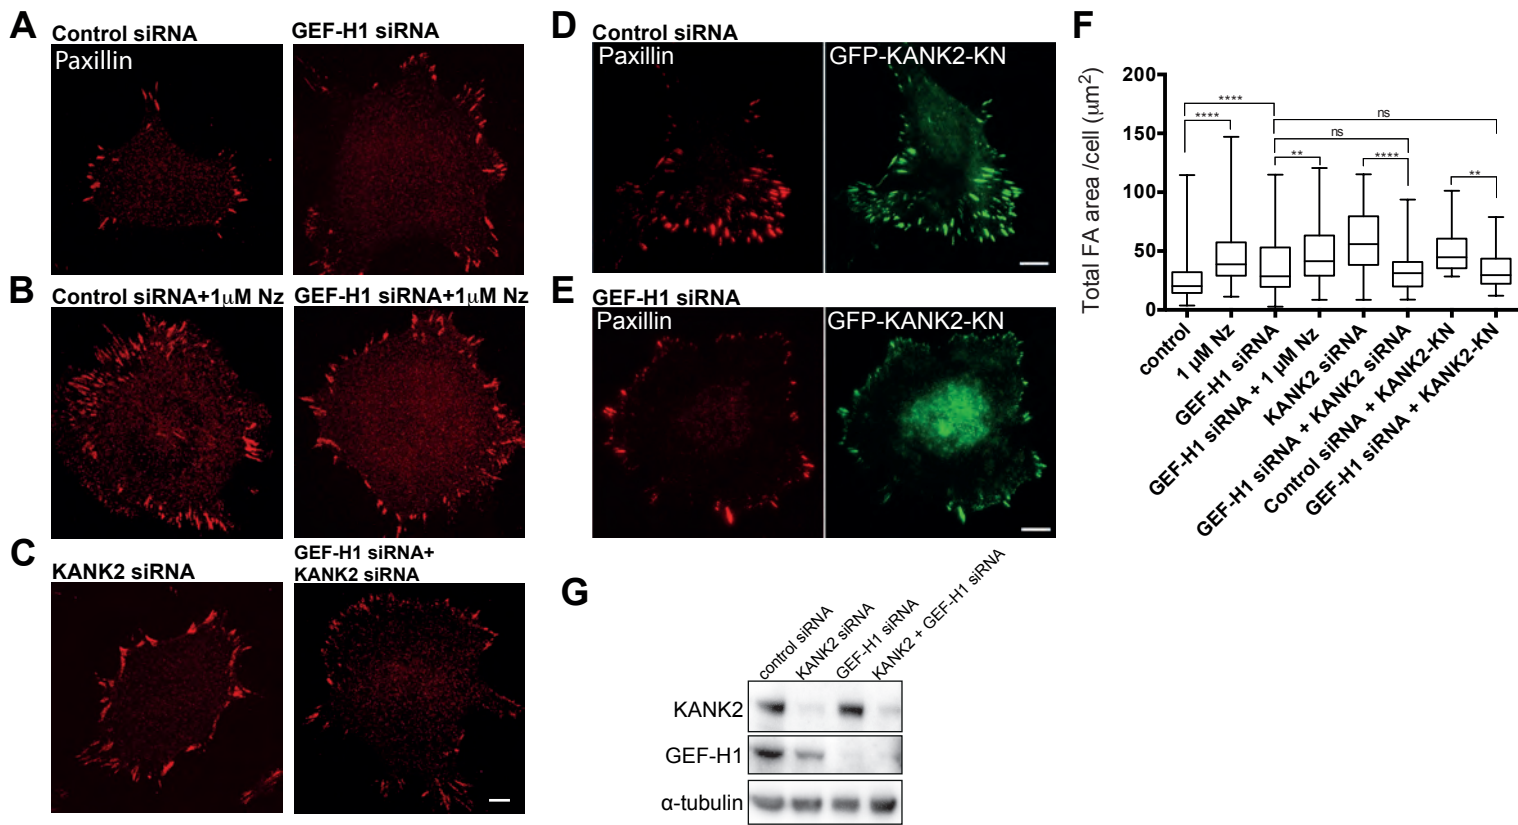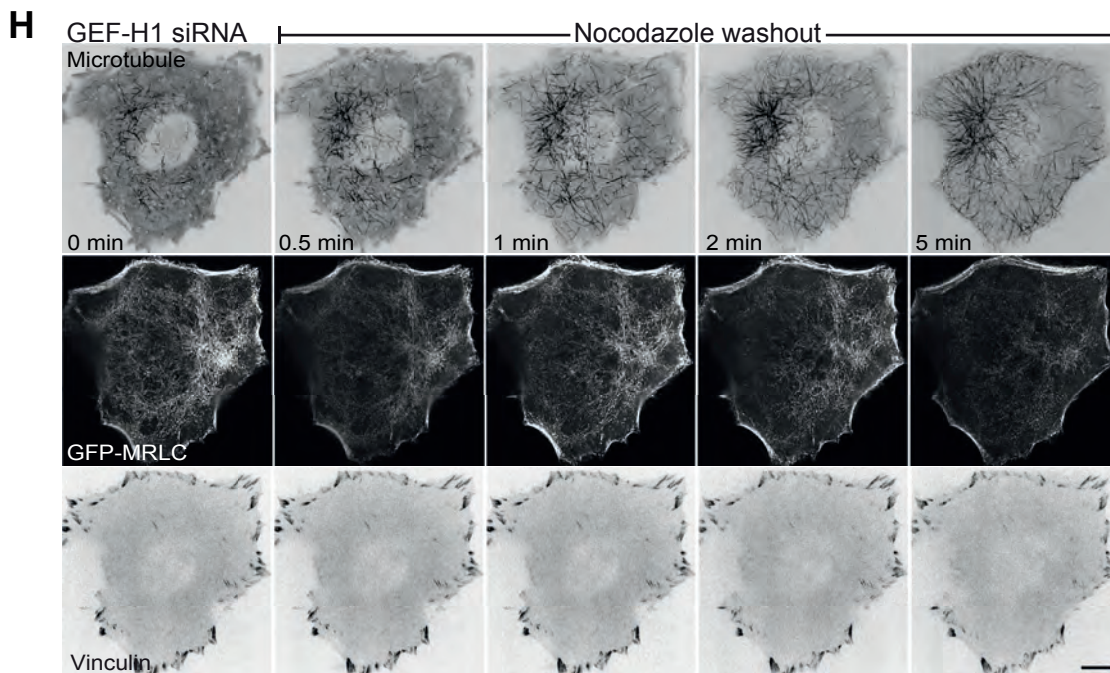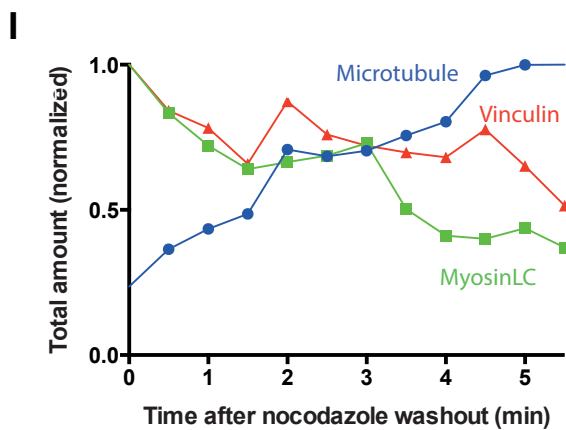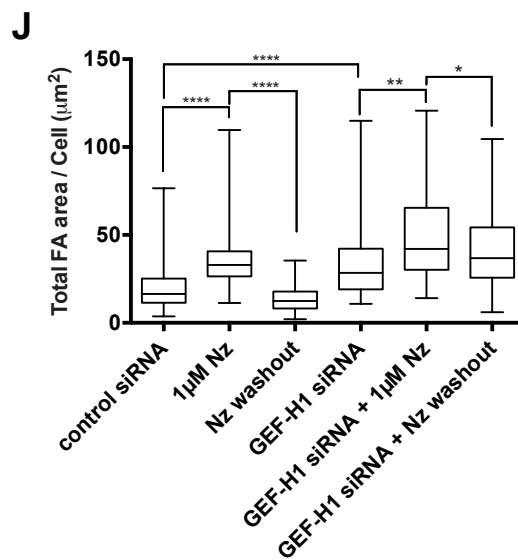

## Supplementary Table 1

Gene expression profile of HT1080 and THP1 cells presented as fragments per kilobase million (FPKM) values. See materials and method section for details of the quantification.

| Gene ID | Protein            | FPKM values |         |
|---------|--------------------|-------------|---------|
|         |                    | HT1080      | THP1    |
| 23189   | KANK1              | 5.46        | 6.74    |
| 25959   | KANK2              | 18.6        | 71.97   |
| 256949  | KANK3              | 0.46        | 0.23    |
| 163782  | KANK4              | 1.37        | -       |
| 23332   | CLASP1             | 8.37        | 10.23   |
| 3688    | Integrin $\beta$ 1 | 547.88      | 69.23   |
| 3689    | Integrin $\beta$ 2 | 0.61        | 217.96  |
| 7094    | Talin-1            | 98.26       | 80.24   |
| 7414    | Vinculin           | 81.37       | 22.35   |
| 8496    | Liprin- $\beta$ 1  | 65.6        | 8.29    |
| 60      | $\beta$ -actin     | 3876.02     | 4328.99 |
| 999     | Cadherin-1         | 0.15        | 0.67    |
